# Supplementary material for: Pickering emulsions stabilized by stacked catanionic micro-crystals controlled by charge regulation
Source: Royal Society of Chemistry journal article supplement (doi:10.1039/c1sm05689a), 2011-01-01
Supplement: c1sm05689a.pdf [file c1sm05689a.pdf]

## Supplementary material

### 1 Raw data of the conductivity

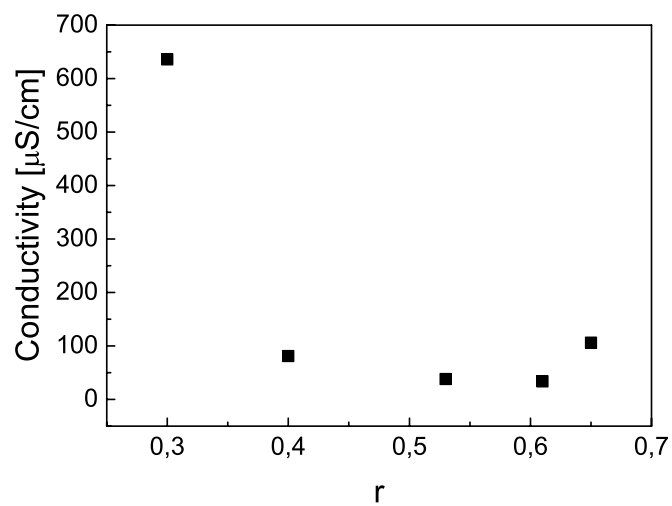

Figure 1: *Conductivity of pure cationic solutions at different ratio of anionic surfactant  $r$ .*

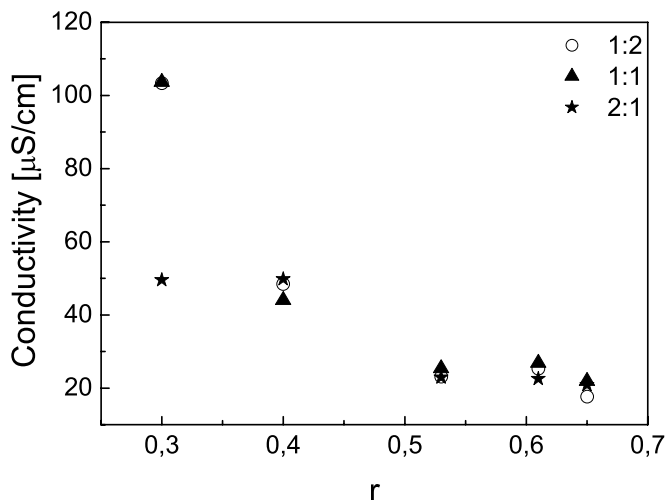

Figure 2: Conductivity of emulsions as a function of the  $r$ -ratio of the cationics at different oil/ cationic solution ratios.

## 2 Calculation of the surface tension for cationics adsorbed at the air-water interface

$$\sigma_{r,A} = \sigma_{r,A}(\text{dispersion}) + \sigma_{r,A}(\text{polar}) \quad (1)$$

and

$$\sigma_{r,T} = \sigma_{r,A} + \sigma_{T,A} - 2\sqrt{\sigma_{r,A}(\text{dispersion})\sigma_{T,A}(\text{dispersion})} \quad (2)$$

where  $\sigma_{T,A} = \sigma_{T,A}(\text{dispersion})$  and  $\sigma_{T,A}(\text{polar})=0$ .

The surface tension of tetradecane is  $\sigma_{T,A}=26.6$  mN/m and the interfacial tension of tetradecane-water is  $\sigma_{T,W}=52.9$  mN/m.

From equation 2 it follows that  $\sigma_{r=0.4,A}(\text{dispersion})=21.3\pm 1$  mN/m,  $\sigma_{r=0.4,A}(\text{polar})=3.7\pm 1$  mN/m,  $\sigma_{r=0.6,A}(\text{dispersion})=22.7\pm 1$  mN/m, and  $\sigma_{r=0.6,A}(\text{polar})=3.3\pm 1$  mN/m.

Finally from equation 3,<sup>1</sup>

$$\sigma_{r,W} = \sigma_{r,A} + \sigma_{W,A} - 2\sqrt{\sigma_{r,A}(\text{dispersion})\sigma_{W,A}(\text{dispersion})} - 2\sqrt{\sigma_{r,A}(\text{polar})\sigma_{W,A}(\text{polar})} \quad (3)$$

where  $\sigma_{W,A}(\text{dispersion})=21.5$  mN/m and  $\sigma_{W,A}(\text{polar})=50.4$  mN/m, one can calculate  $\sigma_{r=0.4,W}=26.8\pm 1$  mN/m and  $\sigma_{r=0.6,W}=27.9\pm 1$  mN/m.

## References

- [1] Binks, B.; Clint, J. H. *Langmuir* **2002**, *18*, 1270–1273.
